# Supplementary material
Source: Springer Nature journal article supplement (https://www.springermedizin.de/resource/supplementary/13054_2008_6568_MOESM5_ESM.pdf/9727806)

Figure 4

A

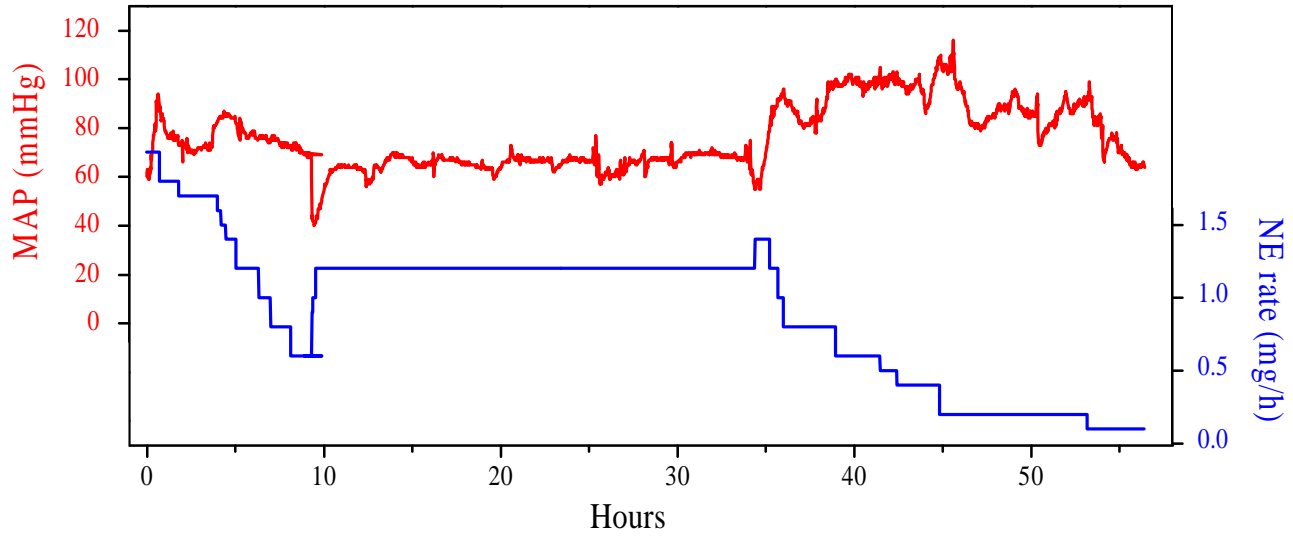

B

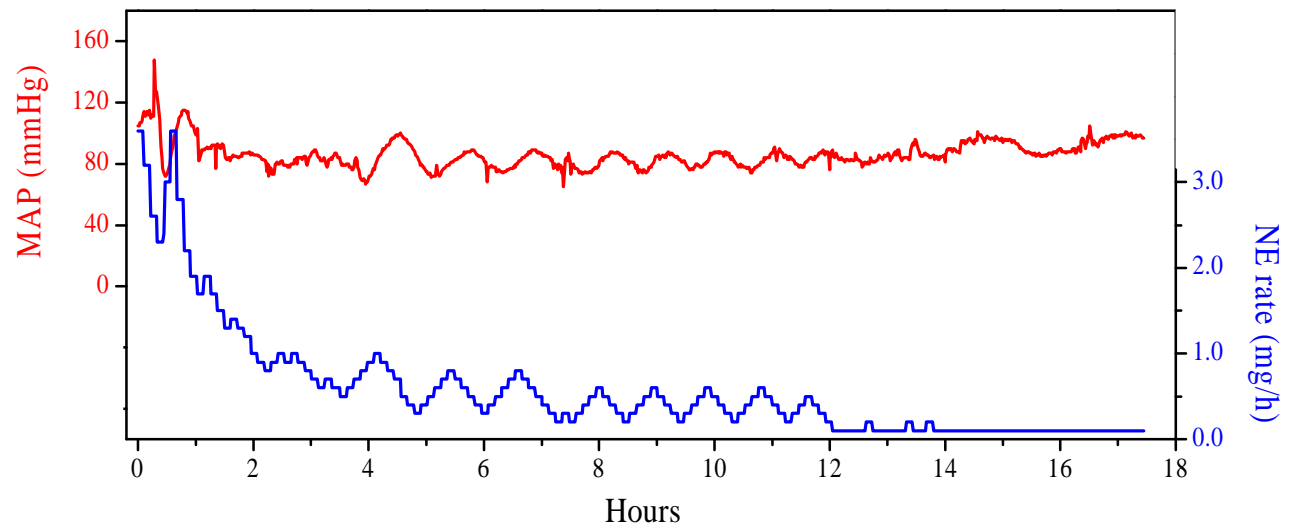

Supplement: MOESM5 [file 9727806]
